# Supplementary material for: Cemiplimab in an Elderly Frail Population of Patients With Locally Advanced or Metastatic Cutaneous Squamous Cell Carcinoma: A Single-Center Real-Life Experience From Italy
Source: PubMed Central journal article supplement (PMC8606572; doi:10.3389/fonc.2021.686308), 2021-11-08
Supplement: DataSheet_1.pdf [file DataSheet_1.pdf]

**Supplementary Table 1. Frailty Assessment. A score of 0-1 defined non-frail patients while a score  $\geq 2$  identified frail patients.**

| Category                   | Score |
|----------------------------|-------|
| Age                        |       |
| $\leq 75$ years            | 0     |
| 76-80 years                | 1     |
| $> 80$ years               | 2     |
| Charlson Comorbidity Index |       |
| $\leq 1$                   | 0     |
| $> 1$                      | 1     |
| ECOG PS score              |       |
| 0                          | 0     |
| 1                          | 1     |
| $\geq 2$                   | 2     |
